# Supplementary material
Source: PubMed Central journal article supplement (PMC1383713)
Supplement: bj3940635add.pdf [file bj3940635add.pdf]

SUPPLEMENTARY ONLINE DATA

**Table S1: Primers used in this study**

| Primer pairs | Sequence*                    | Species and primer position in coding sequence <sup>†</sup> | PCR product |
|--------------|------------------------------|-------------------------------------------------------------|-------------|
| A            | 5'-ATGGAGCAGCCGAGGAAGGCG-3'  | <i>H. sapiens</i> <i>pgp</i> 5' end (1-21)                  | -           |
|              | 5'-TCAGTGTTTGTGGCAATAGTT-3'  | <i>H. sapiens</i> <i>pgp</i> 3' end (610-630)               |             |
| B            | 5'-ATGGAGAAAAAAGTATTGCTT-3'  | <i>B. amyloliquefaciens</i> <i>pgp</i> 5' end (1-21)        | -           |
|              | 5'-TTAGTGAAGCTCGCCTCCGCC-3'  | <i>B. amyloliquefaciens</i> <i>pgp</i> 3' end (628-648)     |             |
| C            | 5'-CATCCCCGCCCTGTGGGAGAA-3'  | <i>H. sapiens</i> <i>pgp</i> internal (171-193)             | -           |
|              | 5'-CACGTGGACGAAGGCTTGATC-3'  | <i>H. sapiens</i> <i>pgp</i> internal (487-507)             |             |
| D            | 5'-GAATGAAGCGCGCATAACCGGA-3' | <i>B. amyloliquefaciens</i> <i>pgp</i> internal (261-291)   | -           |
|              | 5'-CCGGTCTCAATATCGTCCTC-3'   | <i>B. amyloliquefaciens</i> <i>pgp</i> internal (610-629)   |             |
| E            | 5'-GAYCTKCNTGKGTMCANAT-3'    | <i>M. musculus</i> <i>pgp</i> (degenerate) (121-140)        | -           |
|              | 5'-CTCRGMTTTYTCMAGGMYAC-3'   | <i>M. musculus</i> <i>pgp</i> (degenerate) (581-600)        |             |
| F            | 5'-GAYCTKCNTGKGTMCANAT-3'    | <i>M. musculus</i> <i>pgp</i> (degenerate) (121-140)        | -           |
|              | 5'-NCNRCCNGCRTCNYNRGARAT-3'  | <i>M. musculus</i> <i>pgp</i> (degenerate) (418-438)        |             |
| G            | 5'-RCKCRTCCCNKCANTYGGRA-3'   | <i>M. musculus</i> <i>pgp</i> (degenerate) (168-188)        | -           |
|              | 5'-CTCRGMTTTYTCMAGGMYAC-3'   | <i>M. musculus</i> <i>pgp</i> (degenerate) (581-600)        |             |
| H            | 5'-RCKCRTCCCNKCANTYGGRA-3'   | <i>M. musculus</i> <i>pgp</i> (degenerate) (168-188)        | +           |
|              | 5'-NCNRCCNGCRTCNYNRGARAT-3'  | <i>M. musculus</i> <i>pgp</i> (degenerate) (418-438)        |             |

\*Standard notation for degenerate oligonucleotides is employed: N = (A/T/G/C), R = (A/G), Y = (C/T), K = (G/T), M = (A/C).

<sup>†</sup>Sequence positions refer to the published sequences available at the GenBank<sup>TM</sup>/EBI database under accession numbers AJ278828 (*H. sapiens*), AJ278829 (*M. musculus*) and D11035 (*B. amyloliquefaciens*).
